# Supplementary material for: Anthocyanin Color Stabilization by Host-Guest Complexation with p-Sulfonatocalix[n]arenes
Source: MDPI journal article supplement (doi:10.3390/molecules26175389), 2021-09-04
Supplement: s1 [file s1]

# Anthocyanin Color Stabilization by Host-Guest Complexation with *p*-Sulfonatocalix[n]arenes

Johan Mendoza,<sup>a\*</sup> Luis Cruz,<sup>b</sup> Victor de Freitas,<sup>b</sup> Fernando Pina<sup>a</sup> and Nuno Basílio.<sup>a\*</sup>

<sup>a</sup> LAQV – REQUIMTE, Departamento de Química, Faculdade de Ciências e Tecnologia, Universidade Nova de Lisboa, 2829-516 Caparica, Portugal, j.chacon@campus.fct.unl.pt; nuno.basilio@fct.unl.pt

<sup>b</sup> LAQV – REQUIMTE, Departamento de Química e Bioquímica, Faculdade de Ciências, Universidade do Porto, Rua do Campo Alegre, 687, 4169-007 Porto, Portugal.

## Calculation of the association constants

Equation 1 and 2 were used to calculate the host-guest association constants in complexes with 1:1 stoichiometries, these equations require an excess of the host in comparison with the guest. Following we present the deduction of such equations:

When flavylum cation guest ( $AH^+$ ) is the sole species in solution (commonly at pH=1) the interaction with the host ( $SC_n$ ) is described as follow:

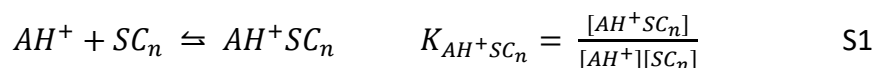

The mass balance for the species containing the guest.

$$C_0 = [AH^+] + [AH^+SC_n] = [AH^+](1 + K_{AH^+SC_n}[SC_n]) \quad S2$$

The molar fraction of the species is calculated:

$$\chi_{AH^+} = \frac{[AH^+]}{C_0} = \frac{1}{1 + K_{AH^+SC_n}[SC_n]} \quad S3$$

$$\chi_{AH^+SC_n} = \frac{[AH^+SC_n]}{C_0} = \frac{K_{AH^+SC_n}[SC_n]}{1 + K_{AH^+SC_n}[SC_n]} \quad S4$$

As the absorbance follows the Lambert-Beer law, we can express it as follow:

$$A_\lambda = C_0(\epsilon_{AH^+}\chi_{AH^+} + \epsilon_{AH^+SC_n}\chi_{AH^+SC_n}) \quad S5$$

And then, introducing the parameter  $r_{AH^+SC_n}$ :

$$r_{AH^+SC_n} = \frac{\epsilon_{AH^+SC_n}}{\epsilon_{AH^+}} \quad S6$$

Being  $\varepsilon_{AH^+}$  and  $\varepsilon_{AH^+SC_n}$  the molar absorption coefficient of the free flavylum and the complexed respectively. Including the mole fraction in Eq. S5, we have equation 1, presented in the main text, where the parameters  $r_{AH^+SC_n}$  and  $K_{AH^+SC_n}$  are fitted with the experimental data.

On the other hand, Equation 2 is deduced taking in account the possible interaction of the conjugate base (CB) species with the macrocycle.

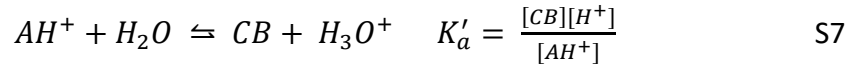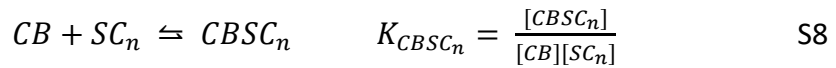

The mass balance would be:

$$\begin{aligned} C_0 &= [AH^+] + [AH^+SC_n] + [CB] + [CBSC_n] \\ &= [AH^+](1 + K_{AH^+SC_n}[SC_n] + \frac{(1 + K_{CBSC_n}[SC_n])K'_a}{[H^+]}) \end{aligned} \quad S9$$

And the mole fraction calculated as:

$$\chi_{AH^+} = \frac{[H^+]}{(1 + K_{AH^+SC_n}[SC_n])[H^+] + (1 + K_{CBSC_n}[SC_n])K'_a} = \frac{[H^+]}{D} \quad S10$$

$$\chi_{AH^+SC_n} = \frac{K_{AH^+SC_n}[SC_n][H^+]}{D} \quad S11$$

$$\chi_{CB} = \frac{K'_a}{D} \quad S12$$

$$\chi_{CBSC_n} = \frac{K_{CBSC_n}K'_a[SC_n]}{D} \quad S13$$

The Lambert-Beer law, can be expressed as:

$$A_\lambda = C_0(\varepsilon_{AH^+}\chi_{AH^+} + \varepsilon_{AH^+SC_n}\chi_{AH^+SC_n} + \varepsilon_{CB}\chi_{CB} + \varepsilon_{CBSC_n}\chi_{CBSC_n}) \quad S14$$

And then, introducing the parameters  $r_{CB}$  and  $r_{CBSC_n}$ :

$$r_{CB} = \frac{\varepsilon_{CB}}{\varepsilon_{AH^+}} \quad r_{CBSC_n} = \frac{\varepsilon_{CBSC_n}}{\varepsilon_{AH^+}} \quad S15$$

Being  $\varepsilon_{CB}$  and  $\varepsilon_{CBSC_n}$  the molar absorption coefficient of the free CB species and the complexed respectively. Including the mole fraction in Eq. S14, we have equation 2, where the parameters  $r_{CBSC_n}$  and  $K_{CBSC_n}$  are fitted with the experimental data, while the  $r_{CB}$  can be obtained from the initial absorbance when  $[SC_n]=0$ .

$$A_{\lambda(SC_n=0)} = A_0\left(\frac{[H^+] + r_{CB}}{[H^+] + K'_a}\right) \quad S16$$

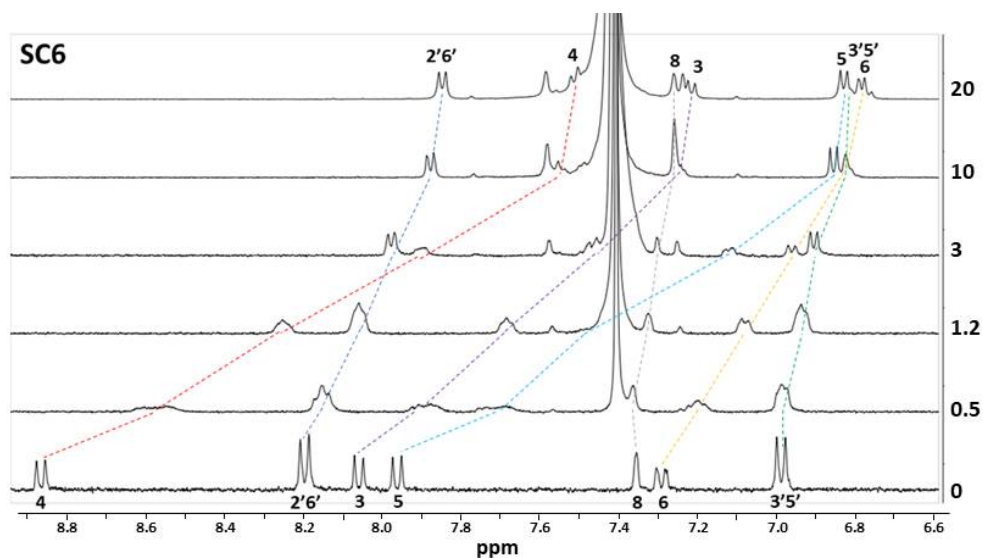

**Figure S1.**  $^1\text{H}$  NMR spectra variations of 4'7OH ( $6.1 \times 10^{-3}$  M) solution upon titration with increasing concentrations of the host: 0, 0.5, 1.2, 3, 10, and 20 equivalents of SC6.

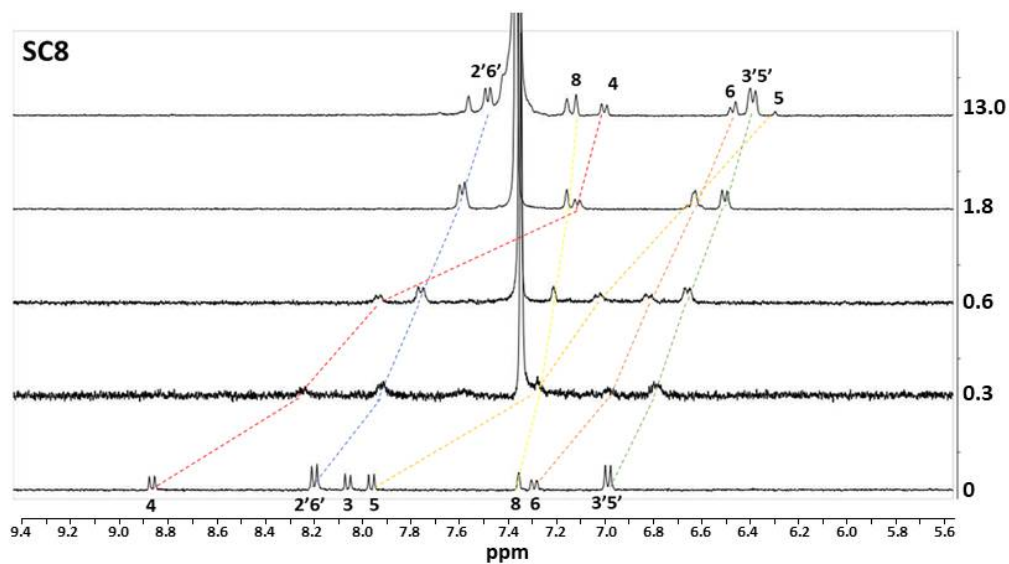

**Figure S2.**  $^1\text{H}$  NMR spectra variations of 4'7OH ( $6.1 \times 10^{-3}$  M) solution upon titration with increasing concentrations of the host: 0, 0.3, 0.6, 1.8, and 13 equivalents of SC8.

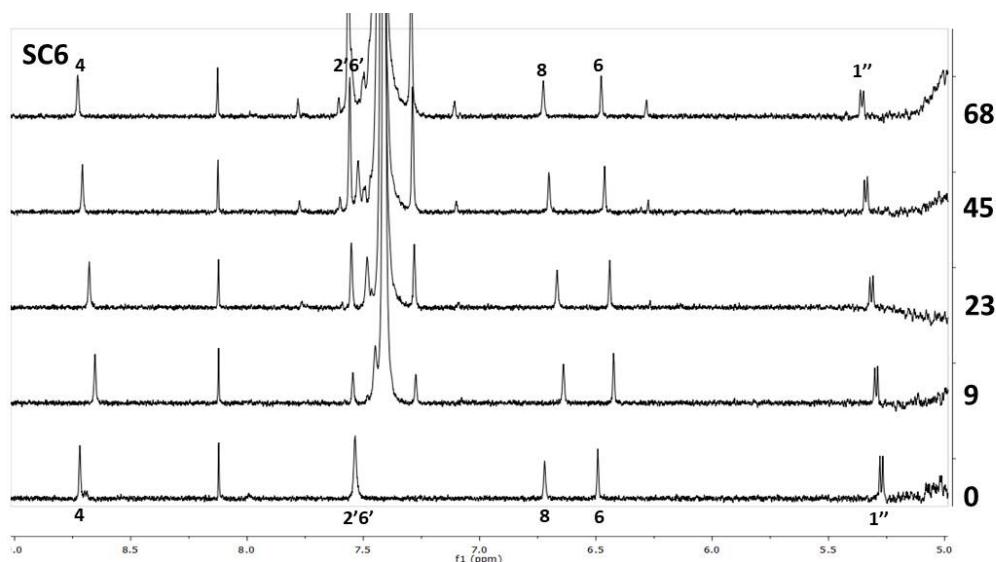

**Figure S3.**  $^1\text{H}$  NMR spectra variations of Oenin ( $2.2 \times 10^{-4}$  M) solution upon titration with increasing concentrations of the host: 0, 9, 23, 45 and 68 equivalents of SC6.

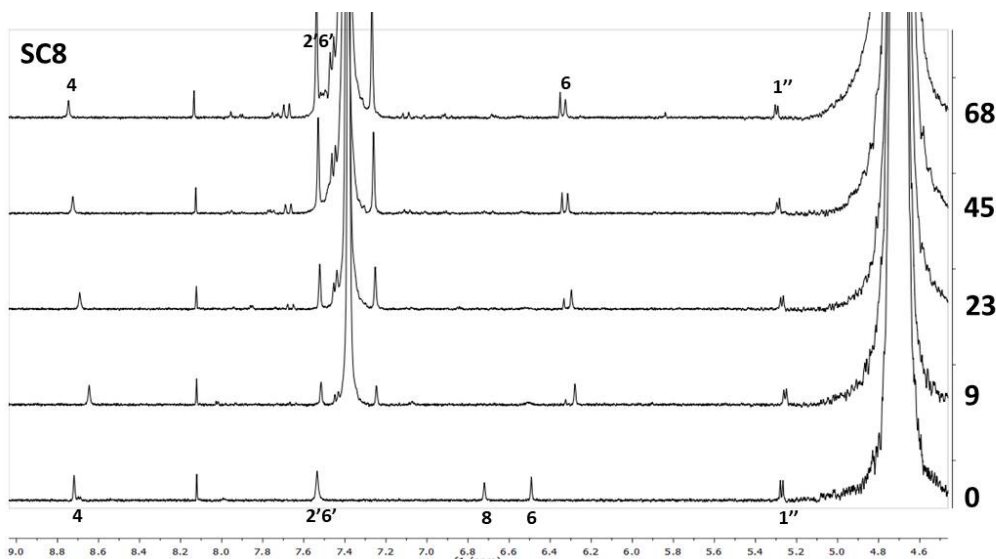

**Figure S4.**  $^1\text{H}$  NMR spectra variations of Oenin ( $2.2 \times 10^{-4}$  M) solution upon titration with increasing concentrations of the host: 0, 9, 23, 45 and 68 equivalents of SC8.

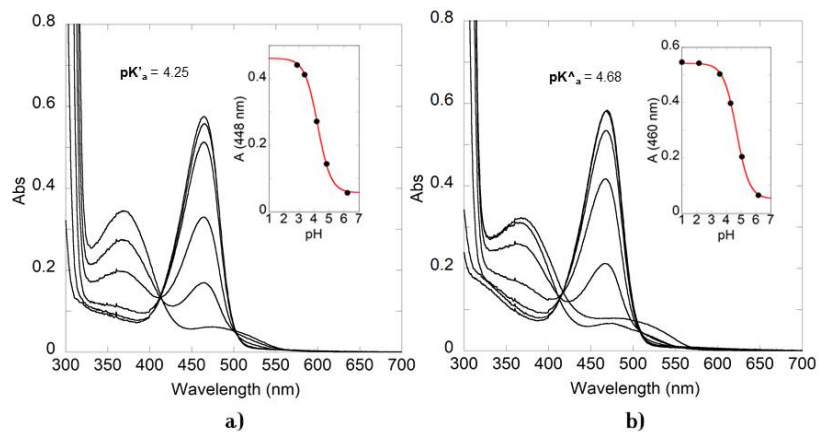

**Figure S5.** UV-Vis spectral variations of equilibrated solutions of 4'7-DHF  $1.15 \times 10^{-5}$  M obtained after direct pH jumps from pH=1 to higher pH values (citrate buffer 0.01M). a) in presence of SC6 64 mM and b) SC8 28 mM. The insets show the fitting for the calculation of  $\text{pK}'_a$ .

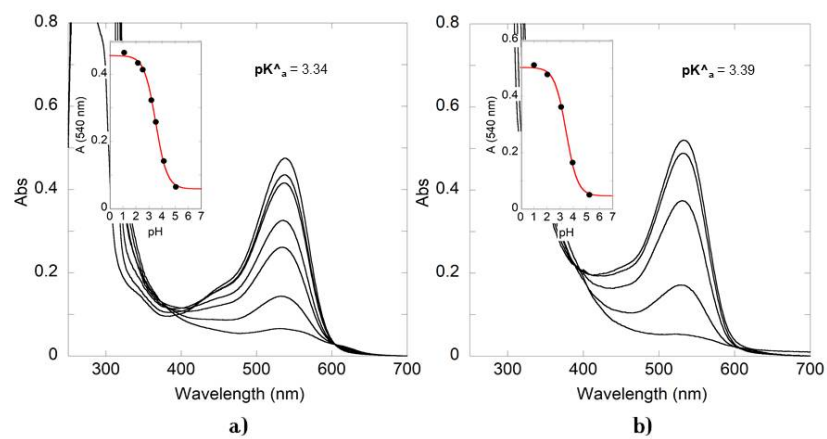

**Figure S6.** UV-Vis spectral variations of pseudo-equilibrated solutions of Oenin  $1.7 \times 10^{-5}$  M obtained after direct pH jumps from pH=1 to higher pH values (citrate buffer 0.01M). a) in presence of SC4 40 mM and b) SC6 32 mM. The insets show the fitting for the calculation of  $pK^a_a$ .
